# Supplementary material for: Neutralizing antibodies derived from the B cells of 1918 influenza pandemic survivors
Source: Springer Nature journal article supplement (doi:10.1038/nature07231), 2008-08-17
Supplement: 41586_2008_BFnature07231_MOESM262_ESM.pdf [file 41586_2008_BFnature07231_MOESM262_ESM.pdf]

**Supplementary Table 1. Serologic testing of volunteers of varying ages**

**(Reciprocal titers are shown, for the indicated test)**

| <b>Donor birthdate category</b> | <b>Subject #</b> | <b>HAI, 1918 VLPs</b> | <b>Neut, 1918 virus</b> | <b>Neut, Sw/30 virus</b> |
|---------------------------------|------------------|-----------------------|-------------------------|--------------------------|
| 1915 or earlier                 | 1                | 640                   | 640                     | 320                      |
|                                 | 2                | 80                    | 80                      | 80                       |
|                                 | 3                | 160                   | 320                     | 80                       |
|                                 | 4                | 1280                  | 320                     | 640                      |
|                                 | 5                | 640                   | 1280                    | 640                      |
|                                 | 6                | 640                   | 640                     | 640                      |
|                                 | 7                | 80                    | 20                      | 80                       |
|                                 | 9                | 160                   | 160                     | 80                       |
|                                 | 10               | 320                   | 320                     | 320                      |
|                                 | 11               | 160                   | 640                     | 320                      |
|                                 | 12               | 160                   | 320                     | 320                      |
|                                 | 13               | 80                    | 40                      | 80                       |
|                                 | 14               | 160                   | 640                     | 160                      |
|                                 | 16               | 160                   | 320                     | 160                      |
|                                 | 17               | 320                   | 1280                    | 320                      |
|                                 | 18               | 320                   | 1280                    | 320                      |
|                                 | 19               | 640                   | 2560                    | 640                      |
|                                 | 20               | < 20                  | 40                      | 20                       |
|                                 | 21               | 320                   | 640                     | 320                      |
|                                 | 22               | 320                   | 320                     | 320                      |
|                                 | 23               | 320                   | 320                     | 320                      |
|                                 | 25               | 320                   | 640                     | 320                      |
|                                 | 26               | 20                    | 40                      | 20                       |
|                                 | 27               | 80                    | 320                     | 80                       |
|                                 | 29               | 320                   | 160                     | 80                       |
|                                 | 30               | 320                   | 320                     | 80                       |
|                                 | 31               | 320                   | 320                     | 80                       |
|                                 | 32               | 160                   | 80                      | 20                       |
|                                 | 34               | 320                   | 80                      | 40                       |
|                                 | 35               | >1280                 | 640                     | 80                       |
|                                 | 36               | >1280                 | 2560                    | 640                      |

|         |    |       |      |      |
|---------|----|-------|------|------|
|         | 38 | >1280 | 640  | 320  |
| 1926-35 | 37 | 20    | 10   | <20  |
|         | 39 | 320   | 80   | 40   |
|         | 40 | 20    | 10   | <20  |
|         | 41 | 20    | <10  | <20  |
|         | 42 | <20   | 20   | <20  |
|         | 43 | <20   | <10  | <20  |
|         | 46 | 20    | 20   | 40   |
|         | 55 | 20    | 20   | 20   |
|         | 62 | 80    | 40   | 80   |
|         | 64 | 40    | 320  | <20  |
| 1936-45 | 8  | <20   | <10  | <20  |
|         | 15 | <20   | 20   | 20   |
|         | 51 | ~20   | 20   | <20  |
|         | 53 | <20   | 10   | <20  |
|         | 54 | <20   | <10  | <20  |
|         | 59 | <20   | <10  | <20  |
|         | 60 | 80    | 40   | 20   |
|         | 61 | 40    | 40   | <20  |
|         | 63 | 640   | 2560 | 640  |
|         | 65 | <20   | 20   | <20  |
| 1946-55 | 44 | <20   | <10  | <20  |
|         | 45 | 20    | <10  | <20  |
|         | 47 | <20   | <10  | <20  |
|         | 48 | <20   | <10  | <20  |
|         | 49 | <20   | 20   | <20  |
|         | 50 | 80    | 20   | <20  |
|         | 52 | <20   | 20   | <20  |
|         | 56 | 160   | 160  | 40   |
|         | 57 | <20   | <20  | <10. |
|         | 58 | 640   | 40   | 640  |

**Supplementary Table 2.** Neutralization or HAI specific activity ( $\mu\text{g}/\text{mL}$ ) against representative H1N1 viruses

| Virus                   | mAb 1F1 |      | mAb 1I20 |      | mAb 2B12 |      | mAb 2D1 |      | mAb 4D20 |      | Human IgG |     |
|-------------------------|---------|------|----------|------|----------|------|---------|------|----------|------|-----------|-----|
|                         | Neut    | HAI  | Neut     | HAI  | Neut     | HAI  | Neut    | HAI  | Neut     | HAI  | Neut      | HAI |
| A/South Carolina/1/1918 | 0.57    | 0.37 | 0.69     | 0.18 | 0.97     | 0.47 | 0.64    | 0.32 | 0.32     | 0.21 | >         | >   |
| A/Swine/Iowa/15/30      | 0.094   | 0.04 | 0.22     | 0.08 | 0.63     | 1.3  | ND      | 0.08 | ND       | 0.04 | >         | >   |
| A/Weiss/43              | 1.8     | 0.31 | >        | >    | >        | >    | ND      | >    | ND       | >    | >         | >   |
| A/USA/L3/1947           | >       | >    | >        | >    | >        | >    | ND      | >    | ND       | >    | >         | >   |
| A/USSR/92/77            | 0.88    | 0.16 | >        | >    | >        | >    | ND      | >    | ND       | >    | >         | >   |
| A/New Caledonia/20/99   | >       | >    | >        | >    | >        | >    | ND      | >    | ND       | >    | >         | >   |

Specific neutralization or HAI activity of mAbs was calculated as the lowest concentration of mAb that displayed activity in the respective assays.

> Indicates activity was not detected at any concentration tested, up to 2.5  $\mu\text{g}/\text{mL}$ .

ND indicates not determined.

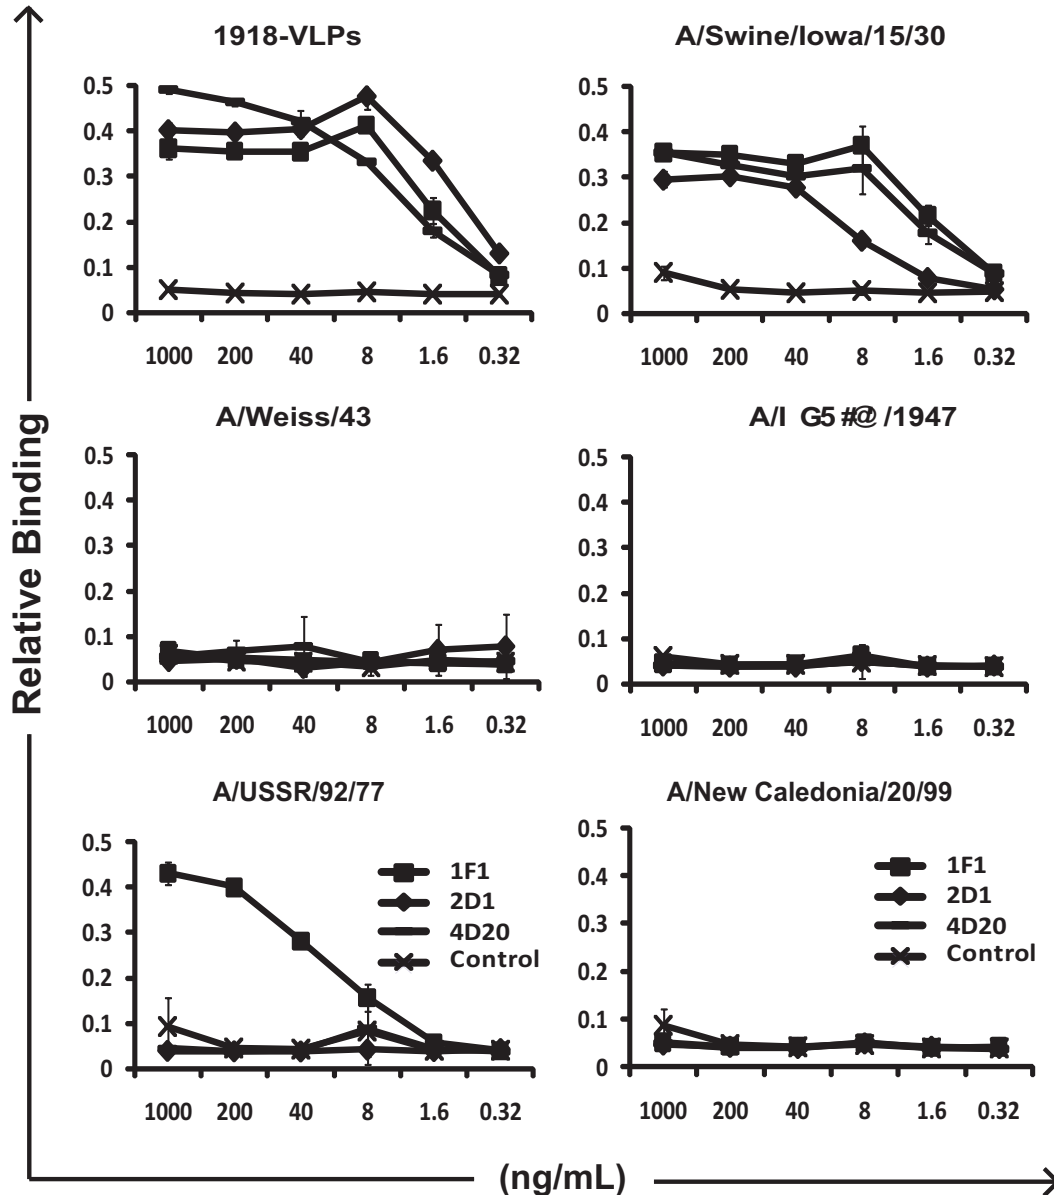

**Supplementary Figure 1. Binding of human mAbs to representative 20<sup>th</sup> century H1N1 viruses.** Equivalent HA units of 1918 virus-like particles, A/Iowa/Swine /30, A/Weiss/43, A/USA/L3/1947, A/USSR/92/77 and A/New Caledonia/20/99 influenza viruses were absorbed onto ELISA plates. An ELISA was performed using serial 1:5 dilutions of mAbs 1F1, 2D1, 4D20 or an H5-specific control mAb. Relative binding (y-axis) indicates optical density in ELISA binding assay to absorbed VLPs or virus.

## Three human mAbs selected for reactivity to the 1918 HA protein in ELISA also bind in transfected cells

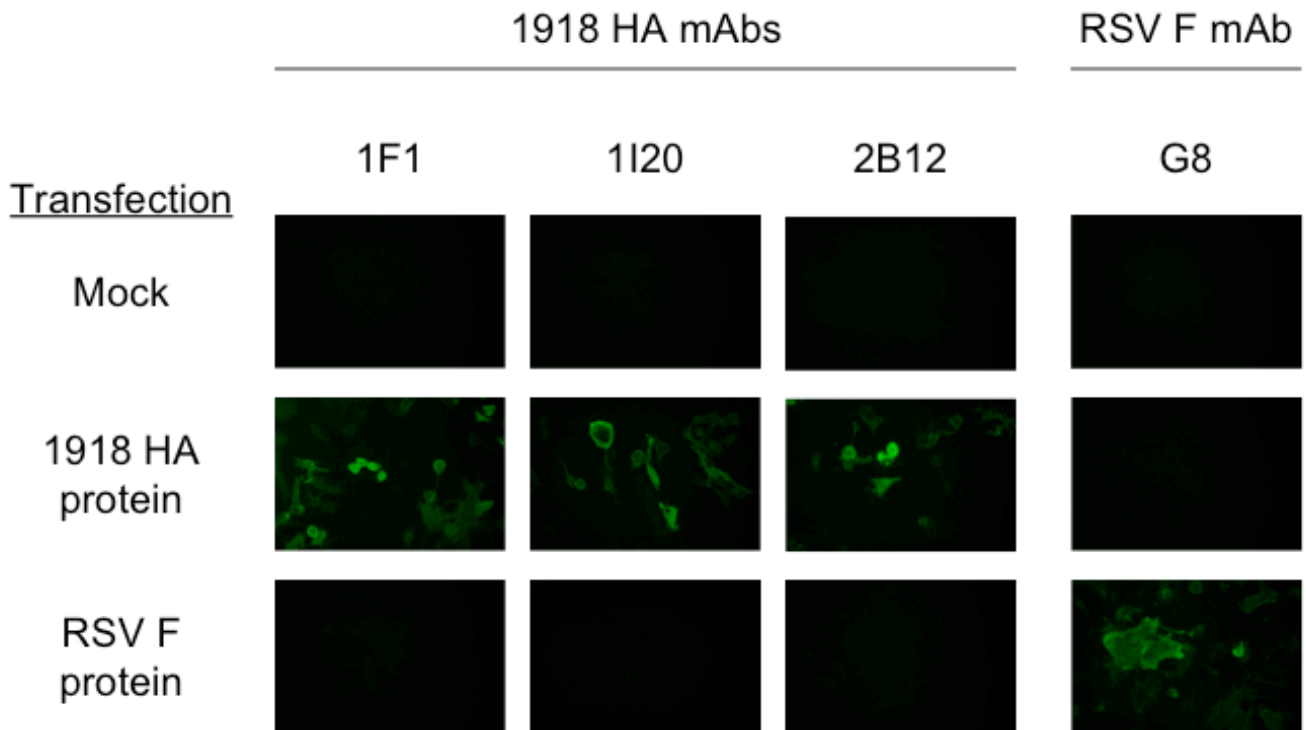

**Supplementary Figure 2. Immunofluorescence detection of binding of 1918 HA-specific mAbs to cultured cells transfected with 1918 HA.** HEp-2 cells were transfected with cDNA encoding 1918 HA or respiratory syncytial virus (RSV) or mock transfected, then antigen was detected by staining with one of three mAbs to 1918 influenza HA at a concentration of 50 ng/mL or a similarly prepared human mAb to RSV designated clone G8, followed by staining with Alexa 488 conjugated goat anti-human IgG antibodies. Digital photomicrographs were obtained using epifluorescence on a Nikon TE300 microscope.

**Sa antigenic site**

|       | 128 | 156   | 162    |
|-------|-----|-------|--------|
| 1918  | PN  | KKGSS | PKLSKS |
| Sw/30 | PN  | KKENS | PKLSKS |
| 1943  | PK  | EKDGS | PNLKNS |
| 1947  | PK  | ETDGS | PKLSKS |
| 1977  | PK  | EKNGS | PNLSKS |
| 1999  | PN  | GKNGL | PNLSKS |

2B12-induced mutations  
(K166Q, K166E or K166P)

**Sb antigenic site**

|       | 186      | 198    |
|-------|----------|--------|
| 1918  | PTGTDQQS | LYQNA  |
| Sw/30 | PTSTDQQS | LYQNA  |
| 1943  | SSIKEQQT | LYQKE  |
| 1947  | SNIEDQKT | LYRKE  |
| 1977  | SNIEDQKT | LYRKE  |
| 1999  | PNIGNQR  | ALYHTE |

1F1 and 1I20-induced mutation  
(P186H)

**Supplementary Figure 3. Alignments of the Sa and Sb antigenic sites from the HA proteins of select H1N1 viruses.** The viruses included are: influenza A/South Carolina/1/18 (H1N1); influenza A/Swine/Iowa/15/30 (H1N1) virus; influenza A/Weiss/43 (H1N1) virus; influenza A/FM/1/47 (H1N1) virus; influenza A/USSR/92/77 (H1N1) virus; influenza A/New Caledonia/20/99 (H1N1) virus; respectively labeled: 1918, Sw/30, 1943, 1947, 1977 or 1999. The alignments are adapted from <sup>13</sup>, and the numbering is based upon alignment to the H3 HA of influenza A/Aichi/2/68 (H3N2) virus, as described <sup>11</sup>. Black text indicates residues conserved among all six HAs. Blue text highlights differences between 1918 and Sw/30 viruses. Red text indicates residues conserved between 1918 and later viruses. Green residues indicate residues that differ from the 1918 HA. Arrows indicate residues that were changed following selection of mAb neutralization resistant mutants.
